# Supplementary material for: Novel tough and thermally stable cyanate ester resins with high flame retardancy, low dielectric loss and constant based on a phenolphthalein type polyarylether sulfone
Source: Royal Society of Chemistry journal article supplement (doi:10.1039/c5ra10670b), 2015-01-01
Supplement: c5ra10670b1.pdf [file c5ra10670b1.pdf]

### Electronic Supplementary Information

Novel tough and thermally stable cyanate ester resins with high flame retardancy, low dielectric loss and constant based on phenolphthalein type polyarylether sulfone

Lin Zhao, Li Yuan, Guozheng Liang,\* and Aijuan Gu\*

Jiangsu Key Laboratory of Advanced Functional Polymer Design and Application  
College of Chemistry, Chemical Engineering and Materials Science  
Soochow University, Suzhou 215123, China

Table S1. Glass transition temperatures of CE and cPES/CE resins

| Resin     | Peak shape               | $T_g$ (°C) |          |
|-----------|--------------------------|------------|----------|
|           |                          | $T_{g1}$   | $T_{g2}$ |
| CE        | One peak                 | —          | 298.4    |
| 5cPES/CE  | One peak                 | —          | 295.1    |
| 10cPES/CE | One peak                 | —          | 290.2    |
| 15cPES/CE | Shoulder peak +Main peak | (265.4)    | 290.1    |
| 20cPES/CE | Two overlapped peaks     | 265.7      | 296.9    |
